# Supplementary material for: Women’s Depressive Symptoms during the COVID-19 Pandemic: The Role of Pregnancy
Source: MDPI journal article supplement (doi:10.3390/ijerph18084298), 2021-04-18
Supplement: s1 [file s1]

**Table S1.** Pearson correlations of study variables among pregnant and non-pregnant women.

| Title                      | 1.      | 2.      | 3.      | 4.     | 5.      | 6.      | 7.    | 8.    | 9.      | 10.    | 11.    |
|----------------------------|---------|---------|---------|--------|---------|---------|-------|-------|---------|--------|--------|
| 1. Age                     | 1.00    |         |         |        |         |         |       |       |         |        |        |
| 2. Education               | .31***  | 1.00    |         |        |         |         |       |       |         |        |        |
| 3. Married                 | -.09**  | .07**   | 1.00    |        |         |         |       |       |         |        |        |
| 4. Employment              | -.01    | -.19*** | -.03    | 1.00   |         |         |       |       |         |        |        |
| 5. Income                  | -.22*** | -.21*** | -.18*** | .15*** | 1.00    |         |       |       |         |        |        |
| 6. Children under 18       | .44***  | .10***  | .13***  | .02    | -.02    | 1.00    |       |       |         |        |        |
| 7. COVID-19 contact        | -.02    | .02     | .03     | -.01   | -.02    | .03     | 1.00  |       |         |        |        |
| 8. COVID-19 undiagnosed    | -.02    | -.03    | -.003   | .03    | .02     | -.001   | .09** | 1.00  |         |        |        |
| 9. Outdoor                 | -.03    | -.006   | -.06*   | .02    | .07**   | -.004   | -.02  | .02   | 1.00    |        |        |
| 10. Partner support        | -.20*** | .07*    | .12***  | -.10** | -.07**  | -.23*** | .03   | -.07* | -.01    | 1.00   |        |
| 11. Family/Friends support | -.16*** | .02     | .03     | -.04   | -.03    | -.23*** | .01   | -.03  | -.05*   | .31*** | 1.00   |
| 12. Healthy behaviors      | -.06*   | .05     | -.02    | -.06   | -.10*** | -.31*** | .02   | -.04  | -.09*** | .24*** | .20*** |

\*  $p < 0.05$ , \*\*  $p < 0.01$ , \*\*\*  $p < 0.001$ .**Table S2.** Pearson correlations of study variables among pregnant women.

| Title                                     | 1.       | 2.      | 3.      | 4.     | 5.      | 6.      | 7.    | 8.     | 9.      | 10.    | 11.    | 12.     | 13.    | 14.    | 15.   | 16.    | 17.     |
|-------------------------------------------|----------|---------|---------|--------|---------|---------|-------|--------|---------|--------|--------|---------|--------|--------|-------|--------|---------|
| 1. Age                                    | 1.00     |         |         |        |         |         |       |        |         |        |        |         |        |        |       |        |         |
| 2. Education                              | .30***   | 1.00    |         |        |         |         |       |        |         |        |        |         |        |        |       |        |         |
| 3. Married                                | -.09**   | *.07*   | 1.00    |        |         |         |       |        |         |        |        |         |        |        |       |        |         |
| 4. Employment                             | -.006    | ***.1   | .03-    | 1.00   |         |         |       |        |         |        |        |         |        |        |       |        |         |
| 5. Income                                 | -.22***  | ***.2   | *.18-   | .16*** | 1.00    |         |       |        |         |        |        |         |        |        |       |        |         |
| 6. Children under 18                      | .44***   | ***.10. | ***.13. | .02    | -.002   | 1.00    |       |        |         |        |        |         |        |        |       |        |         |
| 7. COVID-19 contact                       | -.02     | .2.0    | .3.0    | -.01   | -.02    | .03     | 1.00  |        |         |        |        |         |        |        |       |        |         |
| 8. COVID-19 undiagnosed                   | .2-.0    | .3-.0   | .3.00-  | -.03   | .02     | .001    | .09** | 1.00   |         |        |        |         |        |        |       |        |         |
| 9. Outdoor                                | .3-.0    | .6-.00  | -.06*   | .02    | .07**   | -.004   | -.02  | .02    | 1.00    |        |        |         |        |        |       |        |         |
| 10. Partner support                       | ***.20-  | *.7.0   | .12***  | 0**1-  | -.07**  | -.23*** | .3.0  | .07*   | -.01    | 1.00   |        |         |        |        |       |        |         |
| 11. Family/Friends support                | ***.6-.1 | .2.0    | .3-.0   | -.04   | -.03    | -.23*** | .01-  | -.03   | -.05*   | .30*** | 1.00   |         |        |        |       |        |         |
| 12. Healthy behaviors                     | .6*-.0   | .5.0    | .2-.0   | -.06   | -.09*** | -.31*** | .02   | -.04   | -.10*** | .24*** | .20*** | 1.00    |        |        |       |        |         |
| 13. Gestational age (weeks)               | .4.00    | .01.0   | -.006   | -.01   | -.02    | -.02    | .000  | -0.004 | .02     | .05    | .04    | .01     | 1.00   |        |       |        |         |
| 14. Prenatal appointment altered/canceled | -.08**   | .6-.0   | .04     | .07    | .07*    | .07*    | .07*  | .05    | .11***  | -.02   | .01    | -.05    | .07*   | 1.00   |       |        |         |
| 15. High risk Pregnancy                   | ***.4.1  | .01-    | .007    | .04    | .07*    | .08**   | -.05* | -.07*  | .07*    | -.08*  | -.07*  | -.05    | -.02   | -.09** | 1.00  |        |         |
| 16. Preparedness stress                   | -.20***  | *.0-.1  | .07*    | .03    | .15***  | -.06    | .04   | .10**  | .14***  | -.004  | -.03   | -.17*** | .10*** | .23*** | .05   | 1.00   |         |
| 17. Infection stress                      | -.13***  | *.0-.09 | .06*    | .01    | .12***  | -.01    | -.02  | .07*   | .14**   | -.02   | -.009  | -.13*** | .06    | .21*** | .09** | .70*** | 1.00    |
| 18. Positive Appraisal                    | -.17***  | -.18*** | -.05    | .02    | .16***  | *.12**  | .01   | -.001  | .11***  | .001   | .04    | .03     | -.006  | *.9.0  | .2.0  | .31*** | ***.9.2 |

\*  $p < 0.05$ , \*\*  $p < 0.01$ , \*\*\*  $p < 0.001$ .

### מחשבות לגבי היריון בתקופת הקורונה

מגפת הקורונה העולמית עלולה להוביל לסוגים שונים של מחשבות ותחושות במהלך ההיריון. אנא קראי את המשפטים הבאים ודרגי אותם על הסקאלה שבין 1=מעט מאוד עד 5=הרבה מאוד

|   |   |   |   |   |                                                                                                                   |
|---|---|---|---|---|-------------------------------------------------------------------------------------------------------------------|
| 5 | 4 | 3 | 2 | 1 | אני חוששת ללכת למעקב היריון בשל מגפת הקורונה                                                                      |
| 5 | 4 | 3 | 2 | 1 | אני מוטרדת מכך שלא אקבל את הטיפול שאני זקוקה לו בהיריון בשל מגפת הקורונה                                          |
| 5 | 4 | 3 | 2 | 1 | אני דואגת שאדבק בנגיף הקורונה כשאגיע לבית החולים כדי ללדת                                                         |
| 5 | 4 | 3 | 2 | 1 | אני דואגת שהתינוק שלי ידבק בנגיף הקורונה בבית החולים לאחר שיוולד                                                  |
| 5 | 4 | 3 | 2 | 1 | אני מרגישה שמגפת הקורונה עוזרת לי להעריך את ההיריון שלי יותר                                                      |
| 5 | 4 | 3 | 2 | 1 | אני דואגת מכך שלא יוכל להיות איתי מישו במהלך הלידה                                                                |
| 5 | 4 | 3 | 2 | 1 | אני דואגת מכך שלא אהיה מוכנה ללידה בגלל ההגבלות שקשורות למגפת הקורונה                                             |
| 5 | 4 | 3 | 2 | 1 | אני מרגישה שעצם היותי בהיריון מחזק אותי בתקופת המגפה                                                              |
| 5 | 4 | 3 | 2 | 1 | אני מוטרדת מכך שאני לא אוכלת מספיק בריא, ישנה מספיק או עושה מספיק פעילות גופנית בשל ההגבלות שקשורות למגפת הקורונה |
| 5 | 4 | 3 | 2 | 1 | אני מוטרדת מכך שמחלת הקורונה תפגע בתינוק/ת שלי                                                                    |
| 5 | 4 | 3 | 2 | 1 | אני מוטרדת מכך שמחלת הקורונה תפגע בהיריון שלי (כמו הפלה או ללידה מוקדמת)                                          |
| 5 | 4 | 3 | 2 | 1 | אני מודאגת מכך שהמגפה יכולה להרוס לי את תוכניות הלידה                                                             |
| 5 | 4 | 3 | 2 | 1 | אני מוטרדת מכך שיפרידו אותי מהתינוק/ת שלי לאחר הלידה בשל המגפה                                                    |
| 5 | 4 | 3 | 2 | 1 | אני חושבת על התינוק שיהיה לי כדי לעזור לעצמי לעבור זמנים קשים בתקופה המגפה                                        |
| 5 | 4 | 3 | 2 | 1 | אני מוטרדת מכך שאנשים לא יוכלו לעזור לי לטפל בתינוק/ת שלי אחרי הלידה                                              |

**Figure S1.** COVID-19 Related Thoughts in Pregnancy (Preis, Mahaffey, and Lobel, 2020).

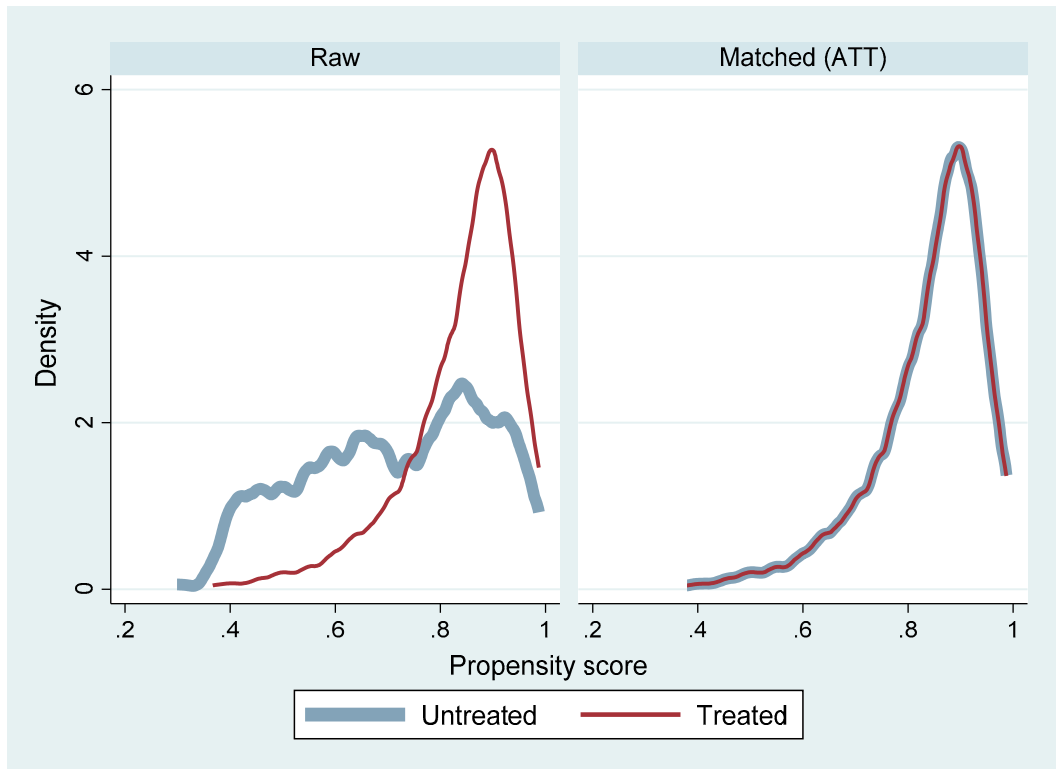

**Figure S2.** Propensity-score matching using a combination of age and education—evaluating balancing of the data.

Note: For post-estimation evaluation of data balancing, kernel density estimates before and after matching (y-axis) are displayed across propensity scores (x-axis). Based on regression-adjusted propensity-score kernel matching with age and education as covariates with a logit model, where pregnancy was defined as Treatment. ATT, average treatment effect on treated. Derived using KMATCH, Stata's module for multivariate-distance and propensity-score matching.

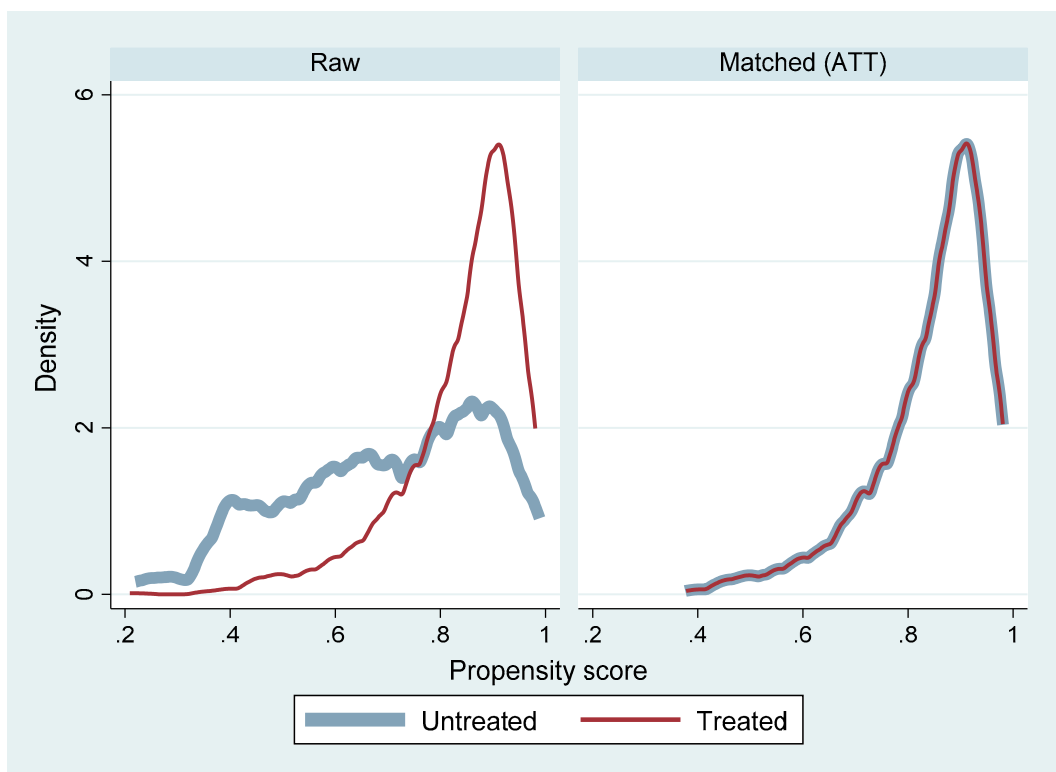

**Figure S3.** Propensity-score matching using a combination of age, education, income and employment status—evaluating balancing of the data.

Note: For post-estimation evaluation of data balancing, kernel density estimates before and after matching (y-axis) are displayed across propensity scores (x-axis). Based on regression-adjusted propensity-score kernel matching with age, education, income and employment status as covariates with a logit model, where pregnancy was defined as Treatment. ATT, average treatment effect on treated. Derived using KMATCH, Stata's module for multivariate-distance and propensity-score matching.

**Table S3.** Propensity-score matching using a combination of age and education—Stata output.

|                                   |              |    |               |          |        |       |           |
|-----------------------------------|--------------|----|---------------|----------|--------|-------|-----------|
| Propensity-score kernel matching  |              |    | Number of obs | =        | 1,368  |       |           |
|                                   |              |    | Kernel        | =        | epan   |       |           |
| Treatment                         | : preg = 1   |    |               |          |        |       |           |
| Covariates                        | : age edu    |    |               |          |        |       |           |
| PS model                          | : logit (pr) |    |               |          |        |       |           |
| RA equations: phq = age edu _cons |              |    |               |          |        |       |           |
| Matching statistics               |              |    |               |          |        |       |           |
|                                   | Matched      |    |               | Controls |        |       | Bandwidth |
|                                   | Yes          | No | Total         | Used     | Unused | Total |           |
| Treated                           | 1103         | 9  | 1112          | 251      | 5      | 256   | .0062601  |

|                              |           |           |       |       |                      |           |
|------------------------------|-----------|-----------|-------|-------|----------------------|-----------|
| Treatment-effects estimation |           |           |       |       |                      |           |
| phq                          | Coef.     | Std. Err. | t     | P> t  | [95% Conf. Interval] |           |
| ATT                          | -.3070851 | .1450836  | -2.12 | 0.034 | -.5916957            | -.0224745 |
| NATE                         | -.2182723 | .1063224  | -2.05 | 0.040 | -.426845             | -.0096995 |

Note: Regression-adjusted propensity-score kernel matching with age and education as covariates, based on a logit model where pregnancy was defined as Treatment. Nine pregnant women could not be matched, and five controls (non-pregnant women) were unused. Estimated effect of pregnancy in pregnant women following PS-matching (ATT) was similar to non-matched effects (NATE). ATT, average treatment effect on treated; NATE, non-matched average treatment effect. Based on KMATCH, Stata's module for multivariate-distance and propensity-score matching.

**Table S4.** Propensity-score matching using a combination of age, education, income and employment status—Stata output.

Propensity-score kernel matching

Treatment : preg = 1

Covariates : age edu i.inc i.emp

PS model : logit (pr)

RA equations: phq = age edu i.inc i.emp \_cons

Number of obs = 1,124

Kernel = epan

Matching statistics

|         | Matched |    |       | Controls |        |       | Bandwidth |
|---------|---------|----|-------|----------|--------|-------|-----------|
|         | Yes     | No | Total | Used     | Unused | Total |           |
| Treated | 887     | 24 | 911   | 199      | 14     | 213   | .0040486  |

Treatment-effects estimation

| phq  | Coef.     | Std. Err. | t     | P> t  | [95% Conf. Interval] |           |
|------|-----------|-----------|-------|-------|----------------------|-----------|
| ATT  | -.3104609 | .152122   | -2.04 | 0.041 | -.6089361            | -.0119856 |
| NATE | -.2833496 | .1181414  | -2.40 | 0.017 | -.5151524            | -.0515468 |

Note: Regression-adjusted propensity-score kernel matching with age, education, income and employment status as covariates, based on a logit model where pregnancy was defined as Treatment. A total of 24 pregnant women could not be matched, and 14 controls (non-pregnant women) were unused. Estimated effect of pregnancy in pregnant women following PS-matching (ATT) was similar to non-matched effects (NATE). ATT, average treatment effect on treated; NATE, non-matched average treatment effect. Based on KMATCH, Stata's module for multivariate-distance and propensity-score matching.
